# Supplementary material for: Heparanase activates the syndecan-syntenin-ALIX exosome pathway
Source: PubMed Central journal article supplement — Cell Res. 2015 Mar 3;25(4):412–28. doi: 10.1038/cr.2015.29 (PMC4387558; doi:10.1038/cr.2015.29), 2015-03-03
Supplement: cr201529x1.pdf [file cr201529x1.pdf]

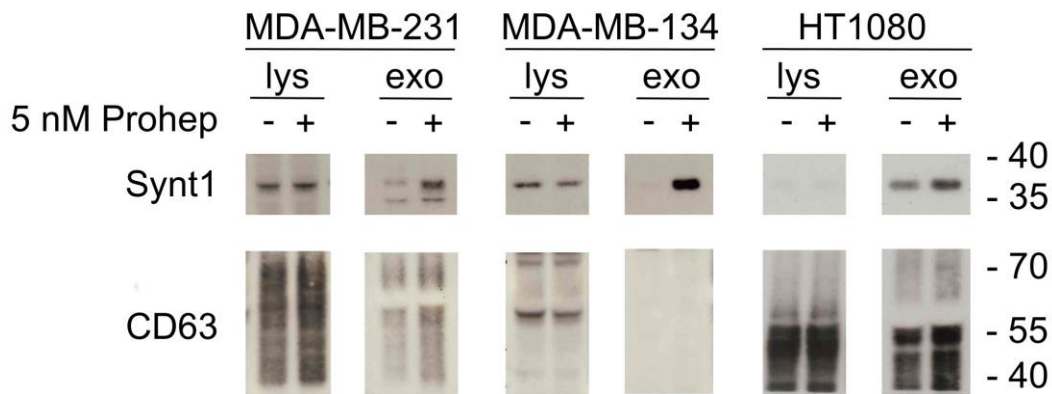

**Supplementary information, Figure S1** Heparanase stimulates exosome production in cell lines other than MCF-7.

Exosome production was evaluated after overnight conditioning of MDA-MB-231 (invasive mammary carcinoma), MDA-MB-134 (noninvasive mammary carcinoma) and HT1080 (metastatic fibro sarcoma) cells with 5 nM of proheparanase and compared to that of cells not receiving proheparanase (0 nM). For each condition both the lysate and exosomal fraction were analyzed by western blotting, using antibodies against syntenin-1 and CD63. Note the marked effect of heparanase addition on exosomal syntenin in MDA-MB-231 and MDA-MB-134 cells (known to have low to moderate levels of endogenous heparanase) and a small to moderate effect of heparanase on exosomal syntenin and CD63 in HT1080 cells (known to express endogenous heparanase at high levels).
