# Supplementary material for: Heparanase activates the syndecan-syntenin-ALIX exosome pathway
Source: PubMed Central journal article supplement — Cell Res. 2015 Mar 3;25(4):412–28. doi: 10.1038/cr.2015.29 (PMC4387558; doi:10.1038/cr.2015.29), 2015-03-03
Supplement: cr201529x5.pdf [file cr201529x5.pdf]

a MCF-7 cells without Prohep

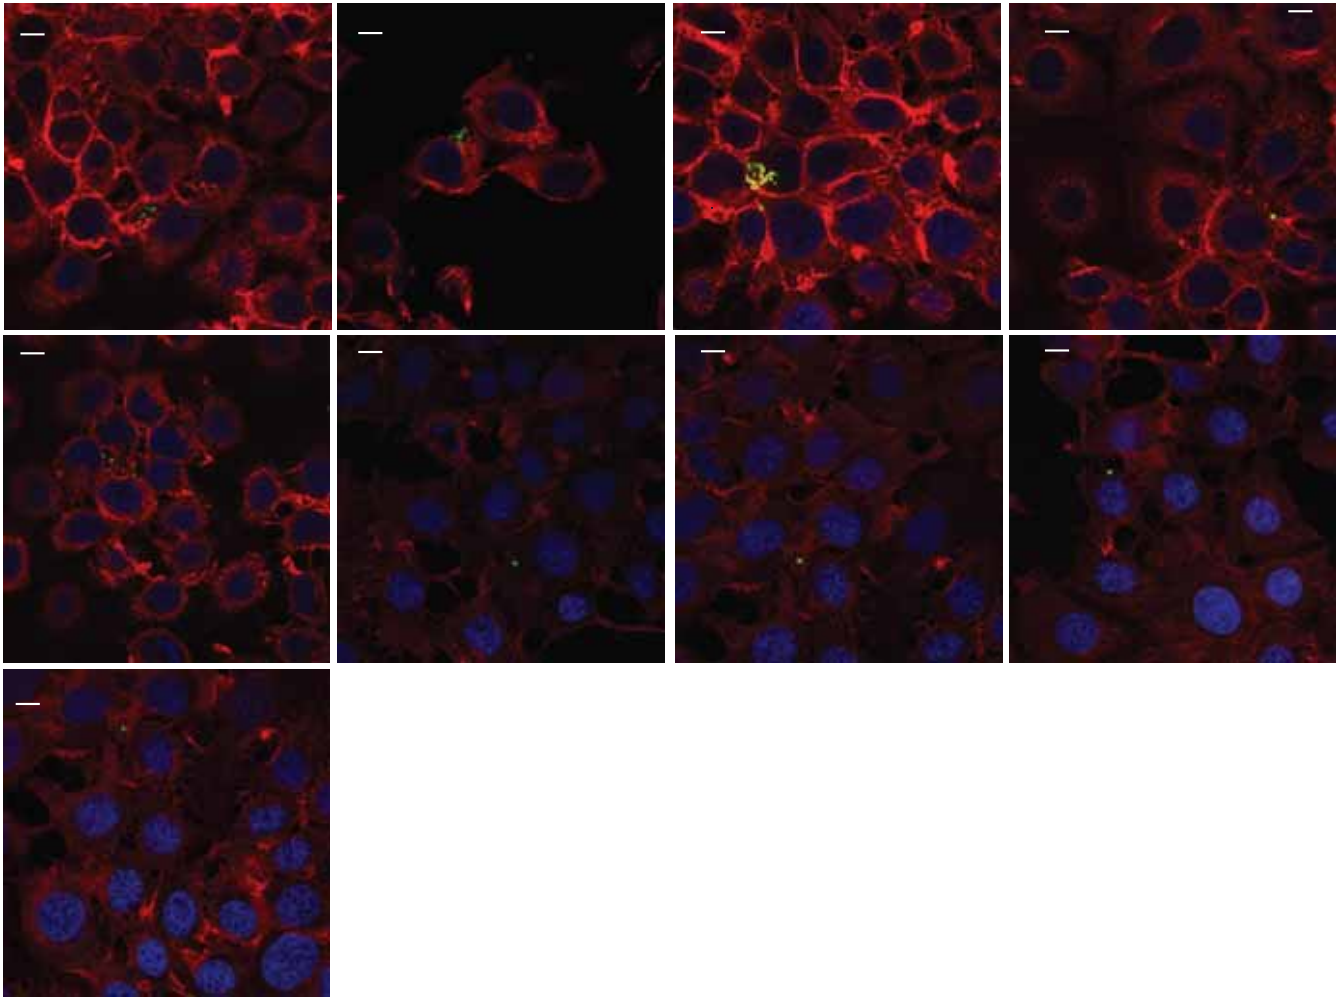

b MCF-7 cells with Prohep

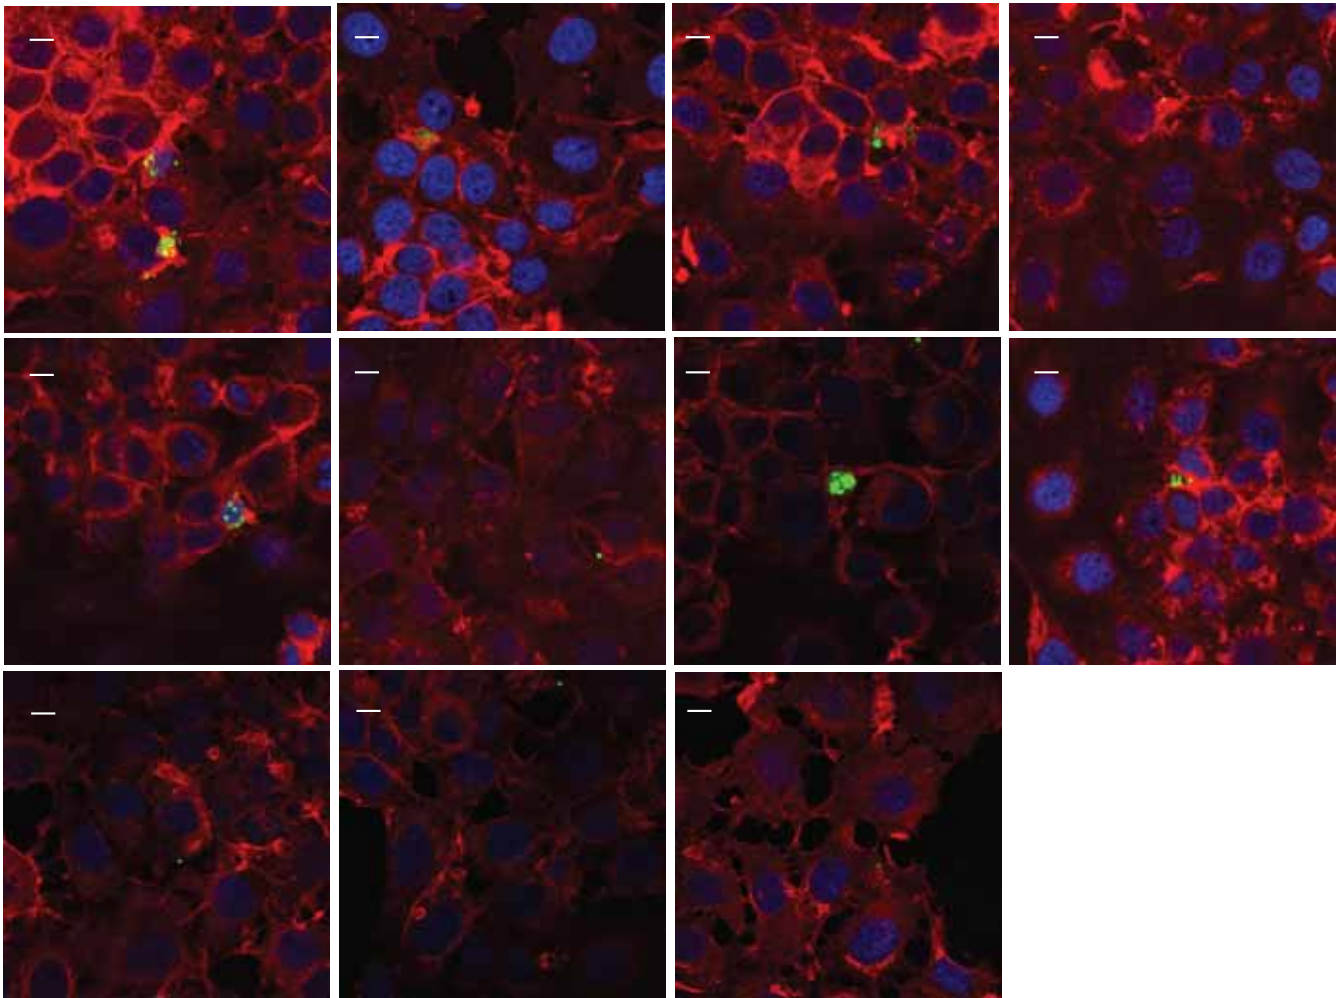

c U-2 OS cells without Prohep

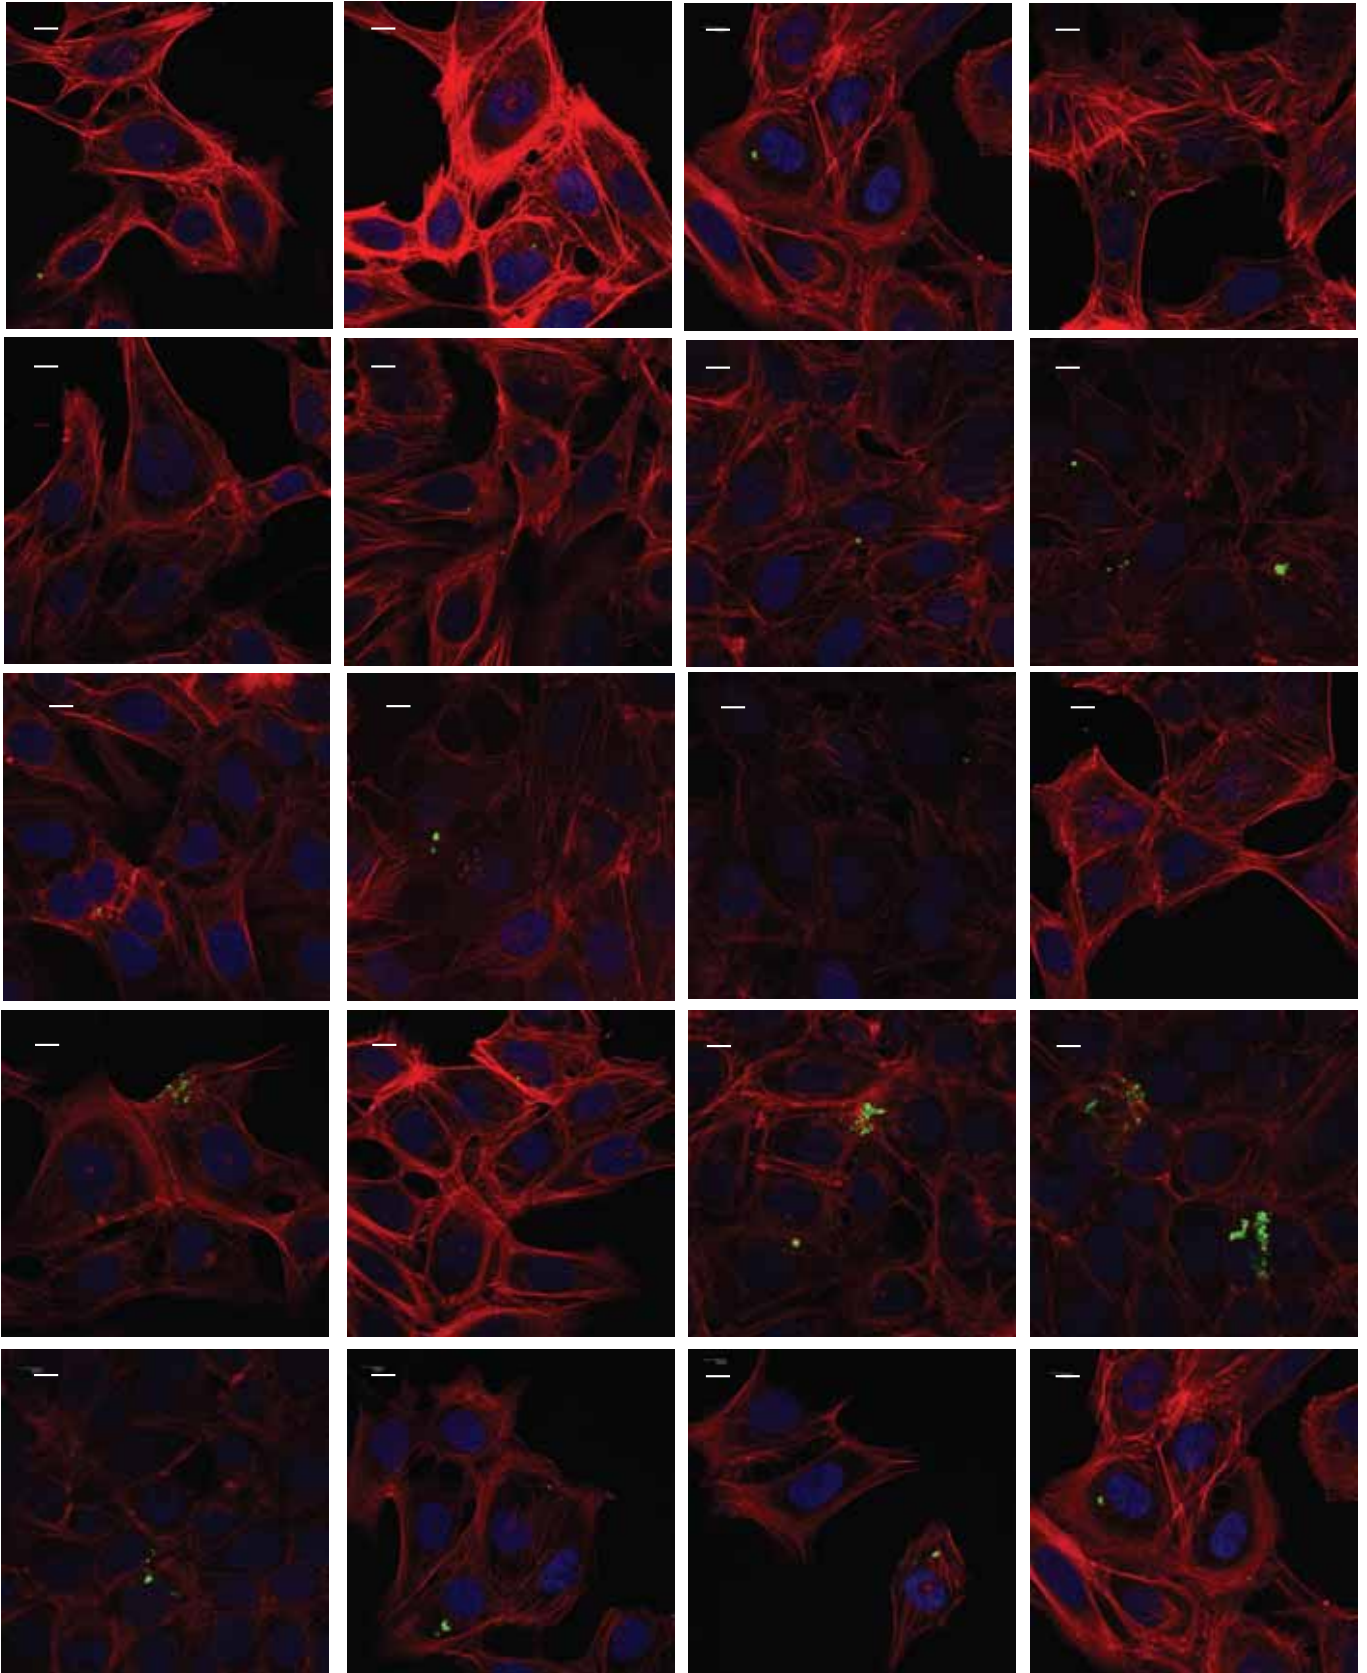



d U-2 OS cells without Prohep

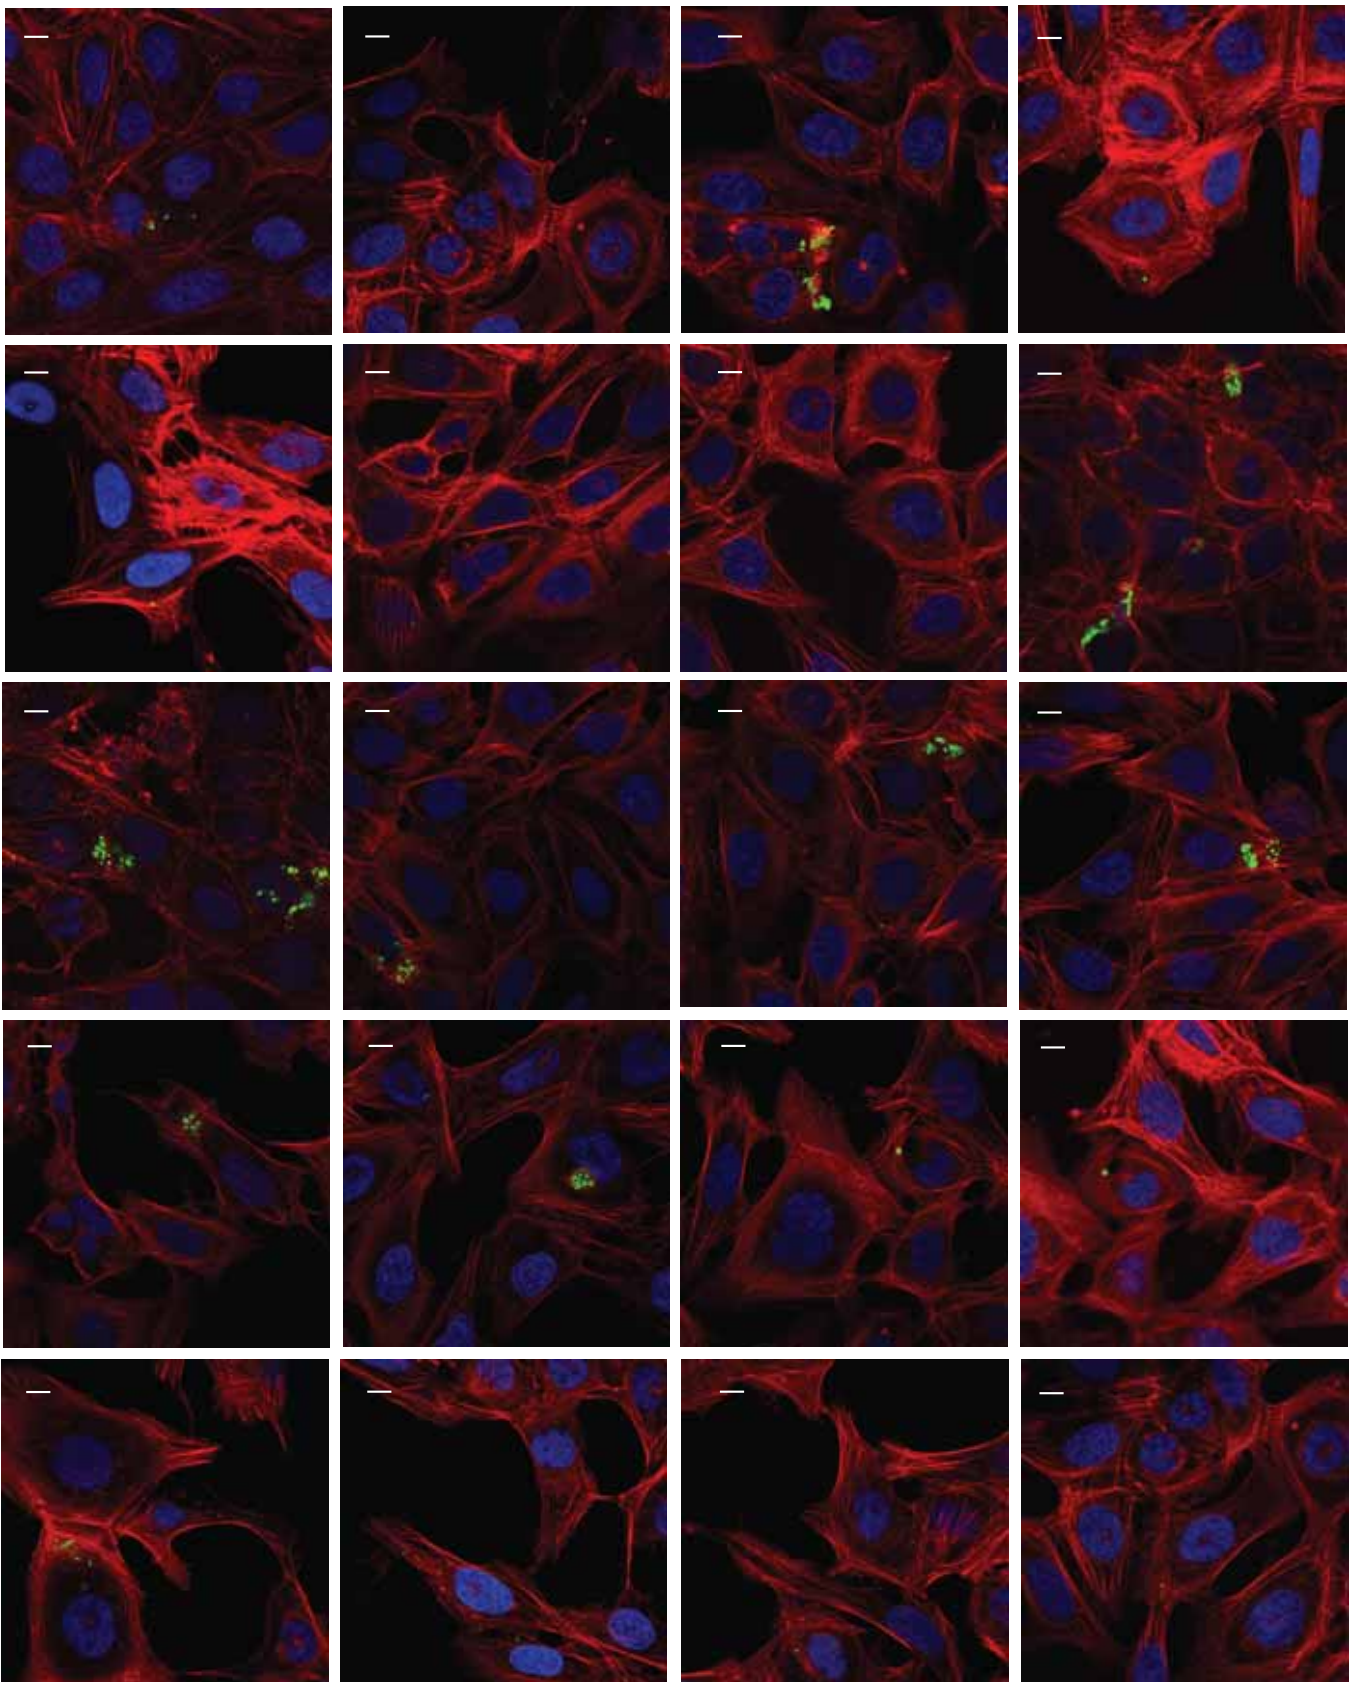

e MCF-7 without Prohep, trypsin treated

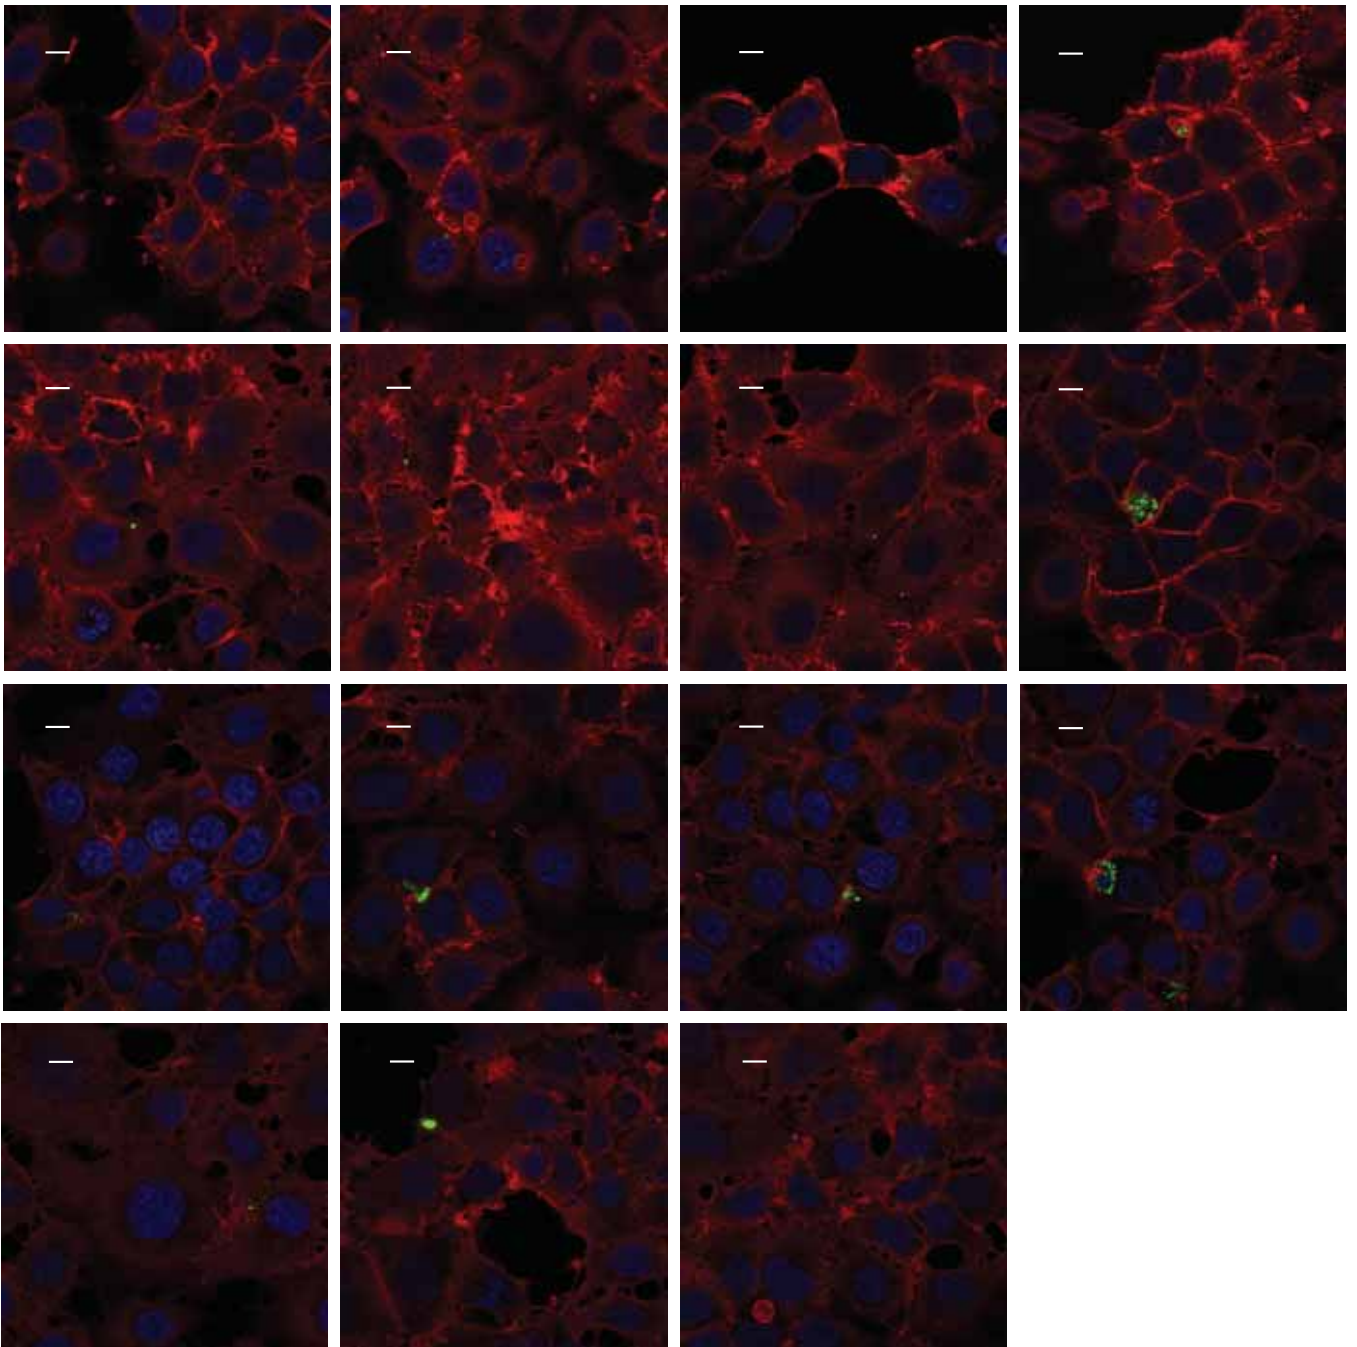



f MCF-7 cells with Prohep, trypsin treated

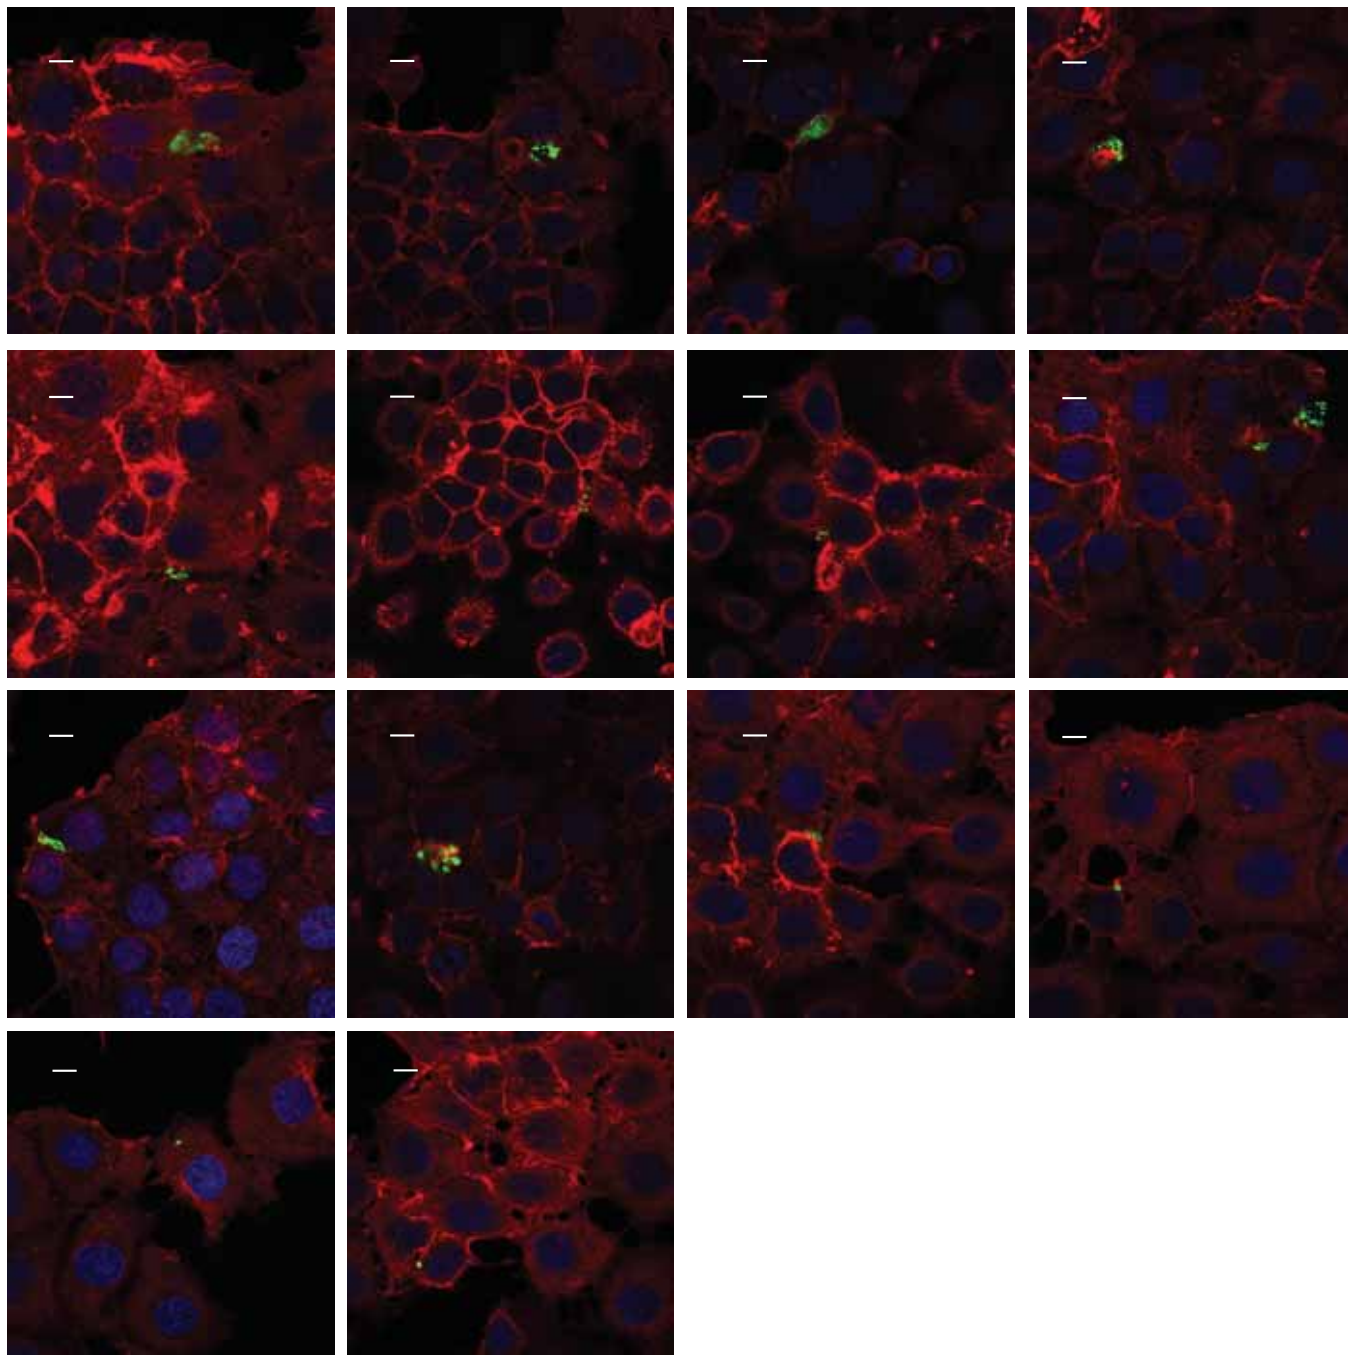

G U-2 OS cells without Prohep, trypsin treated

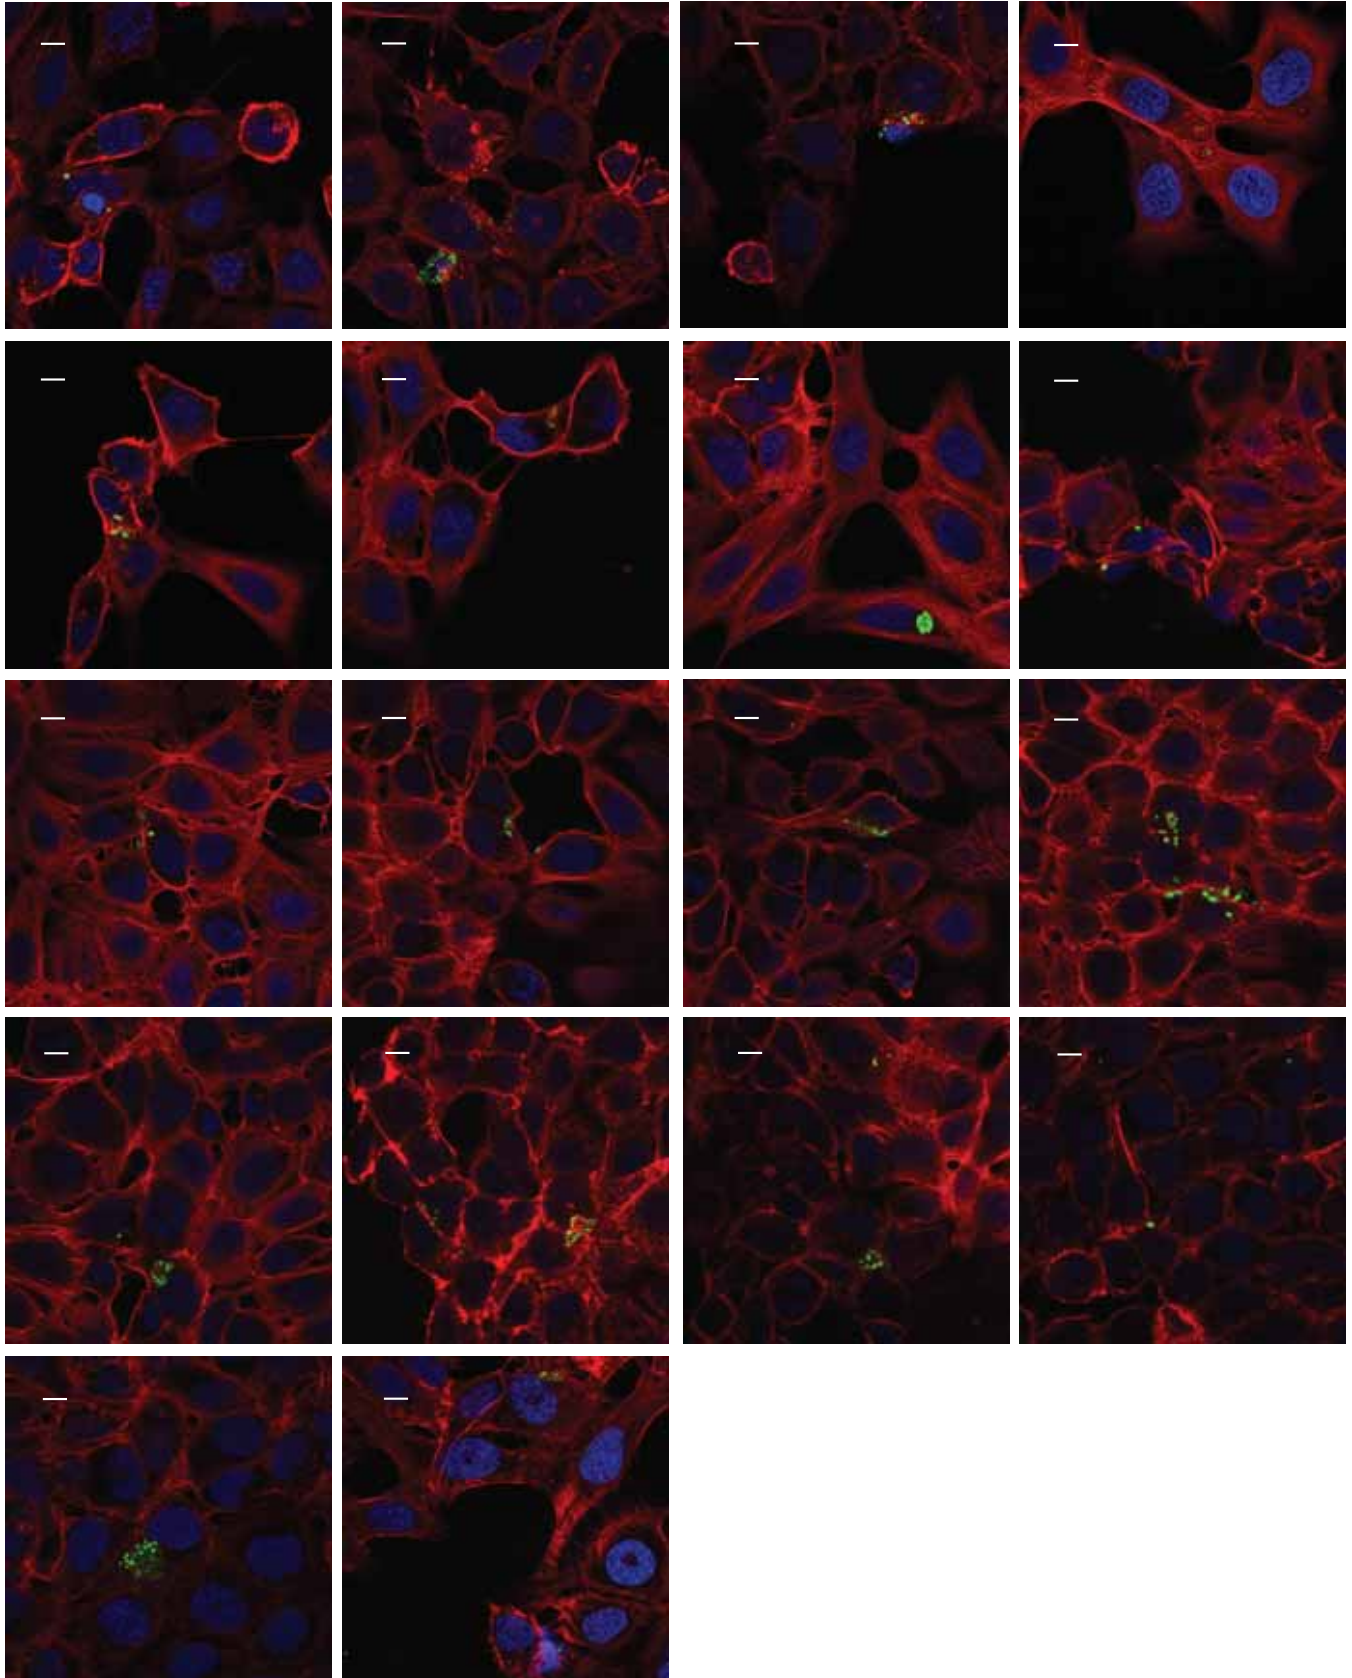



H U-2 OS cells with Prohep, trypsin treated

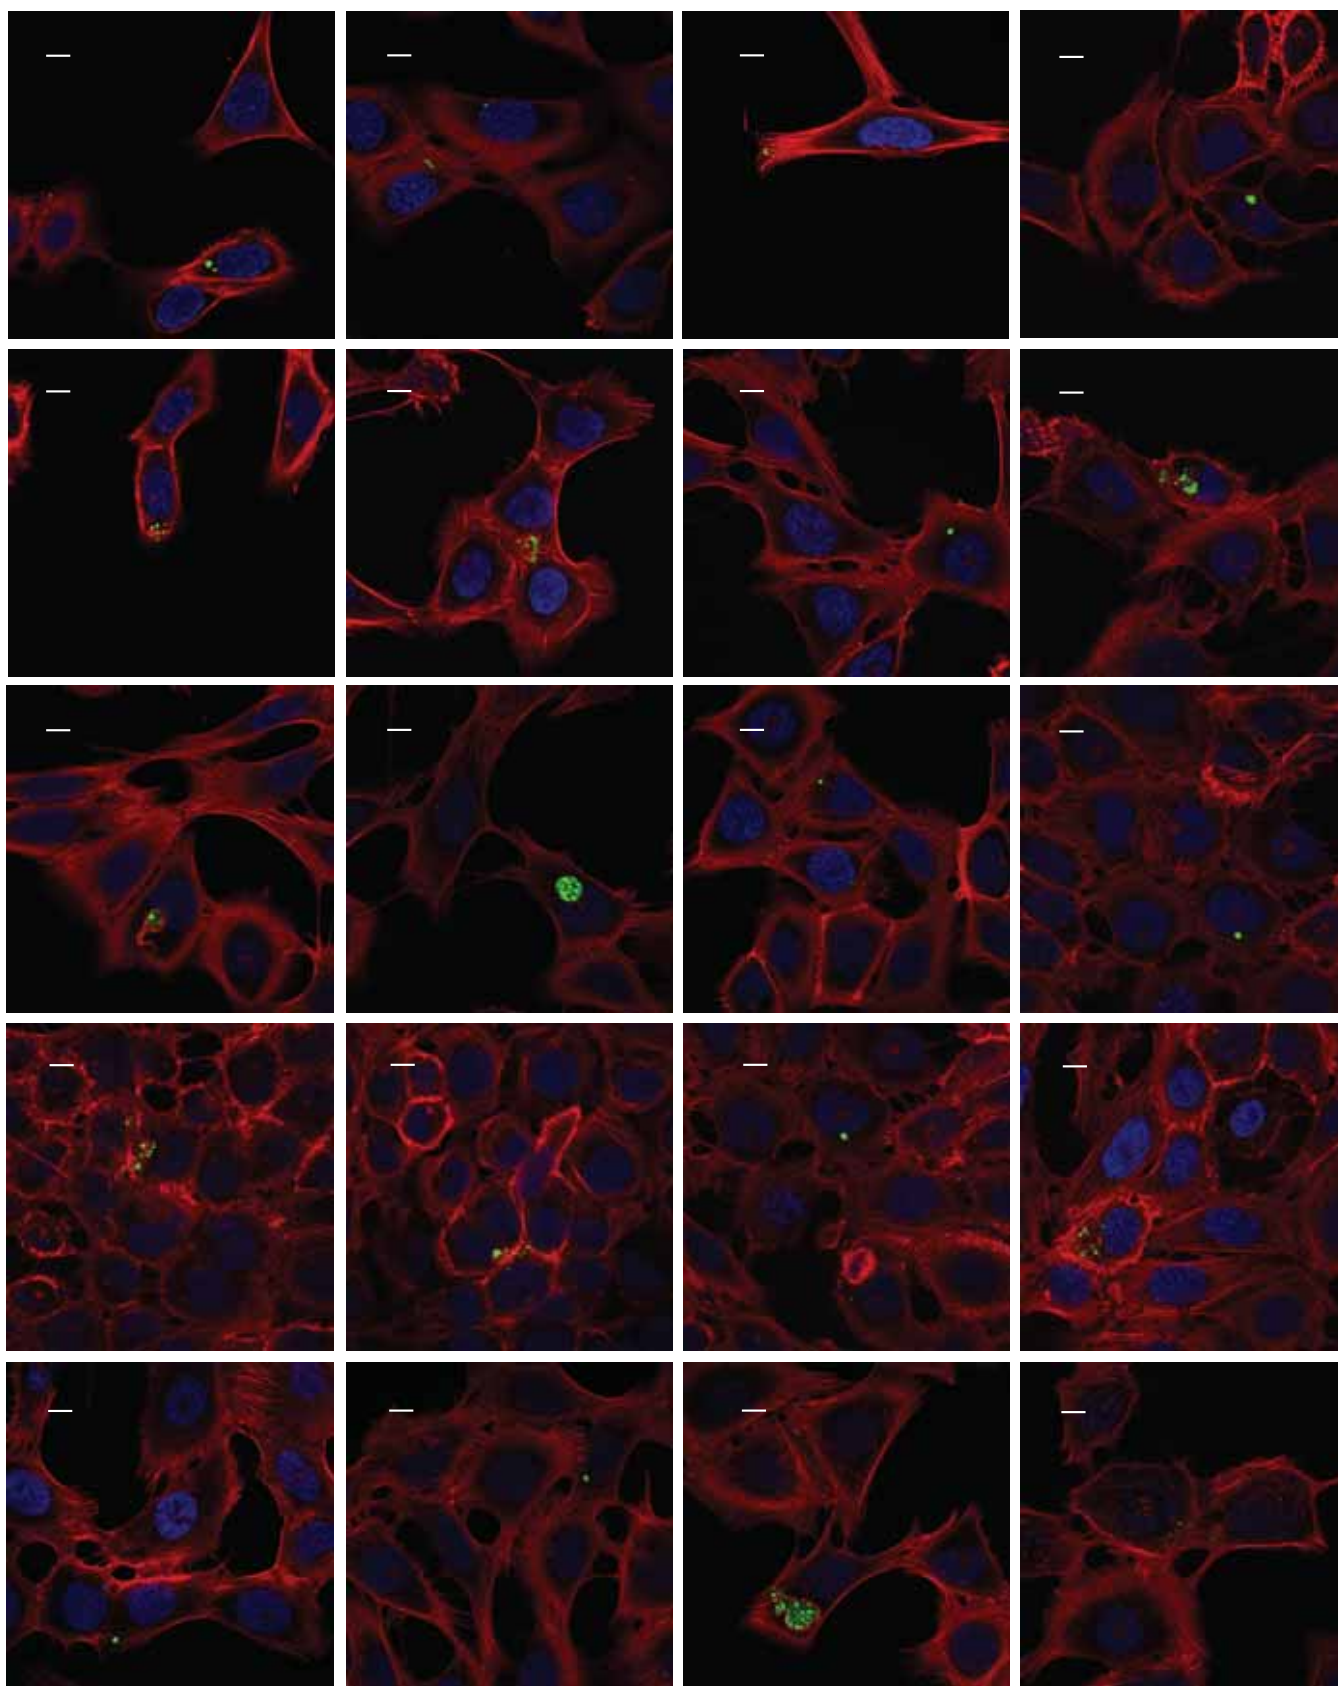



**Supplementary information, Figure S5** Heparanase does not influence syntenin-exosome binding and uptake.

Gallery of confocal images used for quantification of uptake/binding of eGFP-syntenin-1-exosomes. MCF-7 or U-2 OS cells (plated at a density of 20,000 cells per well) were pre-treated with 10 nM proheparanase, or were left untreated, and were then incubated for 2 hours with conditioned media derived from MCF-7 cells expressing eGFP-syntenin-1. To distinguish between exosomes bound to the cell surface and internalized exosomes, at the end of the incubations, cells were treated with TPCK-treated trypsin (12,5 mg/ml). Before being prepared for microscopy cells were washed twice with PBS containing Soybean trypsin inhibitor (125 mg/ml). DAPI (cyan) and Alexa Fluor 594-Phalloidin (red) were used to visualize the nucleus and F-actin, respectively. Every cell containing eGFP was considered positive for syntenin-exosome binding/uptake.
